# Supplementary material for: Novel Eu-containing titania composites derived from a new Eu(iii)-doped polyoxotitanate cage
Source: Royal Society of Chemistry journal article supplement (doi:10.1039/c5ra22857c), 2015-12-14
Supplement: c5ra22857c1.pdf [file c5ra22857c1.pdf]

### Experimental Section

Autoclaves were loaded with reactants in a glove box (Saffron) under N<sub>2</sub>. IR spectra were recorded on a Perkin-Elmer 100 spectrometer with universal ATR. Elemental analysis was obtained using a Perkin-Elmer 4200 elemental analyser. Powder X-ray diffraction (XRD) experiments were performed using a X'Pert Pro diffractometer with Cu-K $\alpha$  radiation ( $\lambda = 1.5418 \text{ \AA}$ ) operating at 40 kV and 40 mA and the scanning angle ranged from 10° to 90° of 2 $\theta$ . Both carbon and hydrogen analyses were done using a vario Micro Elemental analyzer (Elementar Analysensysteme GmbH, Germany). Nuclear magnetic resonance (NMR) spectra in solution were recorded on a Bruker Avance III 500-MHz spectrometer at 298 K using chloroform-d (CDCl<sub>3</sub>) as solvent and tetramethylsilane as standard. Scanning electron microscopy (SEM) images were collected using a field emission scanning electron microscope (Hitachi S-4800). Transmission electron microscopy (TEM) was performed with a FEI Tecnai G2 F30 electron microscope operating at an accelerating voltage of 300 kV. The surface compositions of sample **A** and **B** were determined by energy dispersive spectroscopy (EDS). EDS data were collected using an Thermo SCIENTIFIC energy dispersive X-ray spectroscopy system attached to a Hitachi S-4800 SEM, with an acceleration voltage of 15keV. X-ray photoelectron spectra (XPS) were operated on a spectrometer (Kratos AXIS Ultra DLD, Shimadzu, Japan). Thermogravimetric analysis was obtained using a TA Q100-DSC thermal analyzer, with a constant heating rate of 5 °C/min in air atmosphere. UV-visible spectra of powdered samples of **A** and **B** were recorded in diffuse reflectance mode using a Perkin Elmer Lambda 12 UV-visible spectrometer equipped with an integration sphere (Labsphere RSA-PE-20) and referenced to a white PTFE standard.

### Synthesis and Characterisation of **1**

Titanium ethoxide (> 97% Sigma-Aldrich, 2 ml, 8.8 mmol), EuCl<sub>3</sub> (99% Sigma-Aldrich, 0.258g, 1mmol) and anhydrous ethanol (Sigma-Aldrich, 5.0ml) were mixed in a Teflon-lined autoclave and heated at 150°C for 3 days. Slow cooling to room temperature gave a colourless solution. Colourless block crystals of **4** were obtained by slow evaporation of the filtered solution at room temperature for four weeks, Yield 0.15g (21.2 % with respect to Eu supplied). <sup>1</sup>H NMR (500.1 MHz, +25°C CDCl<sub>3</sub>,  $\delta$  ppm), collection of multiplets in the ranges 5.0-3.4 (CH<sub>2</sub>-O) and 2.0-0.8 (CH<sub>3</sub>). Elemental analysis; found C 31.2, H 6.8, Cl 4.9; calcd. for **1**, C 30.6, H. 6.6, Cl 5.0. IR (800-4000 cm<sup>-1</sup>),  $\nu$ / cm<sup>-1</sup> = 891(m), 924(m), 1043(vs), 1091(s), 1123(s), 1376(m), 1440(w), 2359(w), 2866(m), 2925(m), 2969 (m), 3323(w).

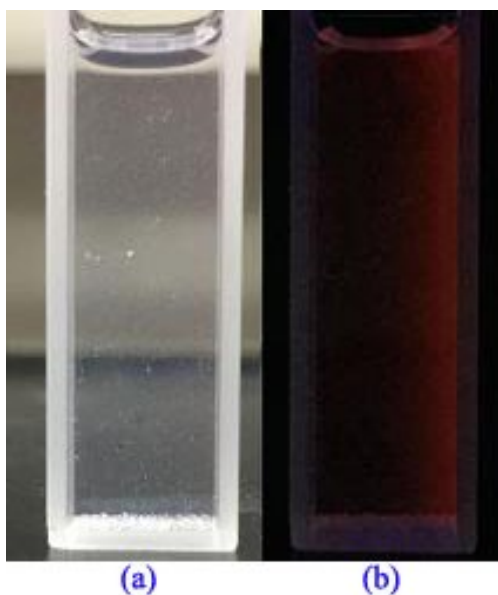

**Fig. S1** (a) Optical image of dichloromethane solution of **1**, (b) image of the fluorescence emission of dichloromethane solution of **1** under 254 nm irradiation.

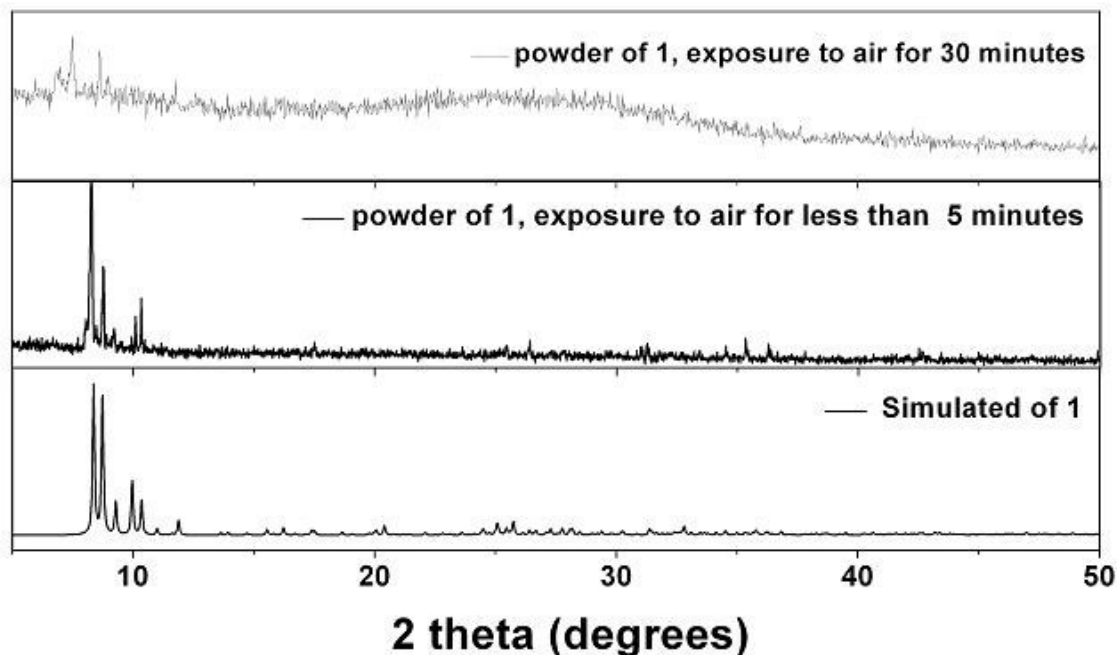

**Fig. S2** Powder-XRD results of cage **1** .

As shown in **Fig. S2**, the simulated XRD patterns of cage**1** coincide well with the measured powder XRD patterns. The diffraction peaks at  $2\theta = 8.34^\circ$ ,  $8.34^\circ$ ,  $9.30^\circ$ ,  $9.92^\circ$  and  $10.36^\circ$  can be indexed to (0,1,1), (1,1,0), (0,2,0), (1,0,-1) and (1,0,1) crystal planes of **1**. However, most diffraction peaks were disappeared after exposed to air for 30 minutes, which indicated the sample had been hydrolyzed and decomposed.

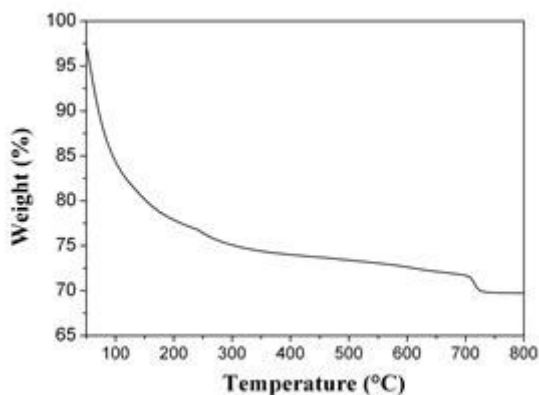

**Fig. S3** TG curve of cage **1**

### *Single Crystal X-ray Crystallography*

Crystal data were collected on a Bruker Smart Apex CCD diffractometer. The structures were solved by Direct Methods and refined by full-matrix least squares on  $F^2$ . (Ref: SHELX, G. M. Sheldrick, *Acta Crystallogr.* **2008**, *A64*, 112).

**Table SI-1** Details of the structure solution and refinement of **1**

| Compound                                   | <b>8</b>                                                                                        |
|--------------------------------------------|-------------------------------------------------------------------------------------------------|
| Chemical formula                           | C <sub>36</sub> H <sub>92</sub> Cl <sub>2</sub> Eu <sub>2</sub> O <sub>20</sub> Ti <sub>4</sub> |
| <i>FW</i>                                  | 1411.52                                                                                         |
| Crystal system                             | Monoclinic                                                                                      |
| Space group                                | <i>P</i> 21/n                                                                                   |
| Unit cell dimensions                       |                                                                                                 |
| <i>a</i> (Å)                               | 11.9475(7)                                                                                      |
| <i>b</i> (Å)                               | 18.9968(13)                                                                                     |
| <i>c</i> (Å)                               | 12.7731(9)                                                                                      |
| $\alpha$ (°)                               |                                                                                                 |
| $\beta$ (°)                                | 92.489(2)                                                                                       |
| $\gamma$ (°)                               |                                                                                                 |
| <i>V</i> (Å <sup>3</sup> )                 | 2896.3(3)                                                                                       |
| <i>Z</i>                                   | 2                                                                                               |
| $\rho_{\text{calc}}$ (Mg/m <sup>3</sup> )  | 1.619                                                                                           |
| $\mu$ (Mo-K $\alpha$ ) (mm <sup>-1</sup> ) | 2.812                                                                                           |
| reflections collected                      | 26482                                                                                           |
| independent reflections                    | 5091                                                                                            |
| ( <i>R</i> <sub>int</sub> )                | (0.0237)                                                                                        |
| <i>R</i> 1, <i>wR</i> 2                    | 0.0230                                                                                          |
| [ <i>I</i> > 2 $\sigma$ ( <i>I</i> )]      | 0.0615                                                                                          |
| <i>R</i> 1, <i>wR</i> 2 (all data)         | 0.0257                                                                                          |
|                                            | 0.0636                                                                                          |

**Table SI-2** Selected bond lengths (Å) and angles (°).

| Bond        | Distance   | Bond         | Distance   |
|-------------|------------|--------------|------------|
| Eu1–O2#1    | 2.3691(19) | Eu1–O3       | 2.4557(19) |
| Eu1–O2      | 2.3777(18) | Eu1–O10#1    | 2.466(2)   |
| Eu1–O1      | 2.439(2)   | Eu1–O4       | 2.5749(19) |
| Eu1–O6      | 2.454(2)   | Eu1–Cl1      | 2.6838(8)  |
| Ti1–O8      | 1.789(2)   | Ti2–O9       | 1.790(2)   |
| Ti1–O7      | 1.861(2)   | Ti2–O10      | 1.919(2)   |
| Ti1–O3      | 1.936(2)   | Ti2–O6       | 1.922(2)   |
| Ti1–O2      | 1.9808(19) | Ti2–O2       | 2.0079(19) |
| Ti1–O5      | 2.071(2)   | Ti2–O5       | 2.023(2)   |
| Ti1–O4      | 2.168(2)   | Ti2–O4       | 2.115(2)   |
| O2#1–Eu1–O2 | 74.06(7)   | O3–Eu1–O10#1 | 80.85(7)   |
| O2#1–Eu1–O1 | 75.28(7)   | O2#1–Eu1–O4  | 126.09(6)  |
| O2–Eu1–O1   | 137.81(7)  | O2–Eu1–O4    | 58.15(6)   |

|                |           |               |           |
|----------------|-----------|---------------|-----------|
| O2#1-Eu1-O6    | 78.28(6)  | O1-Eu1-O4     | 125.28(7) |
| O2-Eu1-O6      | 67.57(6)  | O6-Eu1-O4     | 62.24(6)  |
| O1-Eu1-O6      | 78.39(7)  | O3-Eu1-O4     | 65.59(6)  |
| O2#1-Eu1-O3    | 116.41(7) | O10#1-Eu1-O4  | 146.28(7) |
| O2-Eu1-O3      | 64.79(6)  | O2#1-Eu1-Cl1  | 145.92(5) |
| O1-Eu1-O3      | 157.06(7) | O2-Eu1-Cl1    | 139.36(5) |
| O6-Eu1-O3      | 122.13(6) | O1-Eu1-Cl1    | 77.79(5)  |
| O2#1-Eu1-O10#1 | 65.61(6)  | O6-Eu1-Cl1    | 116.15(5) |
| O2-Eu1-O10#1   | 105.38(7) | O3-Eu1-Cl1    | 83.25(5)  |
| O1-Eu1-O10#1   | 87.25(8)  | O10#1-Eu1-Cl1 | 92.77(5)  |
| O6-Eu1-O10#1   | 143.51(7) | O4-Eu1-Cl1    | 86.73(5)  |

Symmetry code: (#1) 1-x, -y, -z.

### Preparation of **A**, **B**, and **P**

20ml dichloromethane solution of **1** (0.1 mmol) was dissolved in 60ml 50% ethanol aqueous solution and then stirred under ultrasound. After filtering the suspension and drying at 150 °C for 12h, a white powder of **A** was obtained.

1.5g of dried crystals of **1** was heated at 500 °C for 5 hour in a (dry) air flow, an off-white solid of **B** was obtained.

Precursor **1** was dissolved in poly-methylmethacrylate (weight ratio 1:20) in a toluene-dichloromethane mixed solution. The resulting solution was cast onto a clean glass plate and dried at 15 °C. Film **P** were obtained by soaking the glass plates in de-ionized water which led to the films separating from the glass substrate.

### Elemental Analysis of **A** and **B**

**A**, C 0.51 wt %, H 0.72%; **B**, C 1.12 wt %, H 0.44%. These results can be compared to EDS measurements which show much higher C and H values due to background and surface contamination.

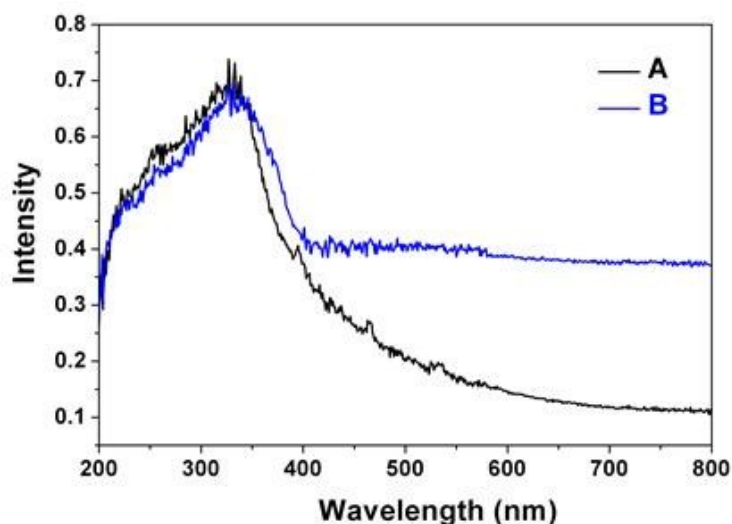

**Fig. S4** Solid-state UV-vis absorption spectra of **A** and **B**

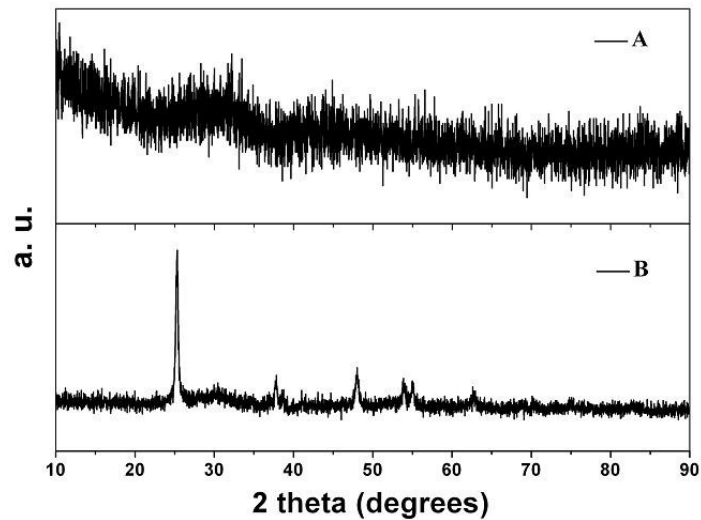

**Fig. S5** Powder-XRD of **A** and **B**

The *p*XRD result for sample **B** show that the TiO<sub>2</sub> is present in the form of anatase and there is a weak peak at 30.35 degree which is contributed by Eu<sub>2</sub>Ti<sub>2</sub>O<sub>7</sub>; whereas **A** is amorphous. (Ref: J. L. Her, C. W. Lin, K. Y. Chang and T. M. Pan, *Int. J. Electrochem. Sci.*, 2012, **7**, 387-404).

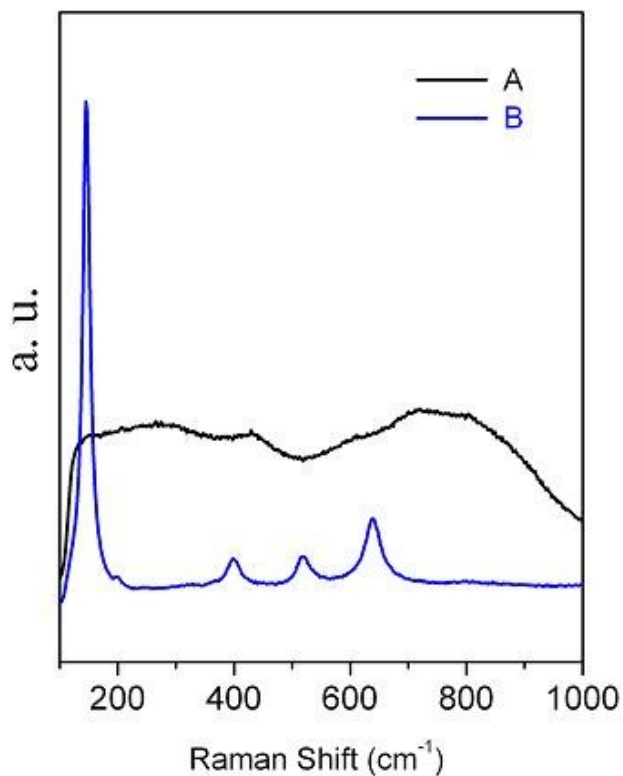

**Fig. S6** Raman spectra of **A** and **B**

Raman spectra of sample **A** exhibit several broad bands centered at 275, 432, 606, 720, 805cm<sup>-1</sup> due to its amorphous phase, but raman spectra of sample **B** show sharp peaks at 145, 199, 399, 519, 642 cm<sup>-1</sup> which is contributed by anatase phase (Ref: O. Frank, M. Zukalova, B. Laskova, J. Kürti, J. Koltai and L. Kavan, *Phys. Chem. Chem. Phys.*, 2012, **14**, 14567-14572).

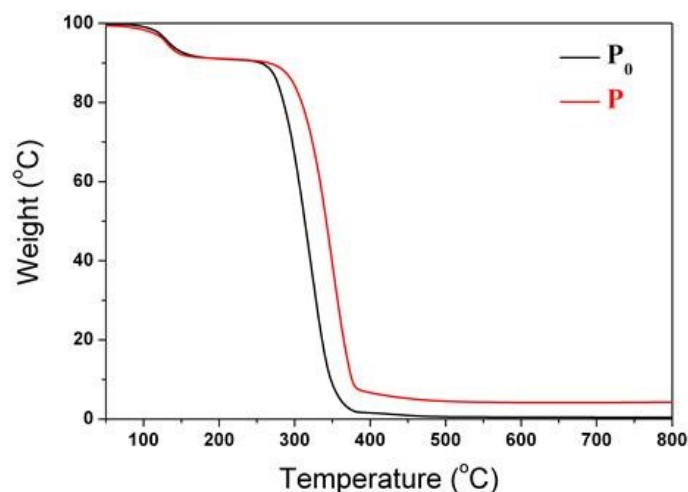

Fig. S7 TG curve of  $P_0$  and  $P$ .

The thermal stability of the films is evaluated by the 10% weight loss temperatures ( $T_{10\%}$ ). As shown in Fig. S5, both  $P_0$  and  $P$  are stable up to 250 °C,  $T_{10\%}$  of  $P$  is 265.4 °C [higher than that of  $P_0$  (254.8 °C)]. It can be seen that the thermal stability of the PMMA film is increased after incorporation of cage **1**.

*Adjustment of film P.*

Changing the weight ratio of cage **1** and poly-methylmethacrylate into 1:10 ( $P_1$ ) and 1:5 ( $P_2$ ), we can obtain different films show stronger fluorescence (Fig S8), the emission intensity increases with the increase of concentration of **1**; altering the drying temperature from 15°C to 40 °C, the surface of  $P$  can be adjusted from smooth to porous (Fig S9b, Fig S9c). Moreover, the thickness of film  $P$  can also be adjusted (Fig S9).

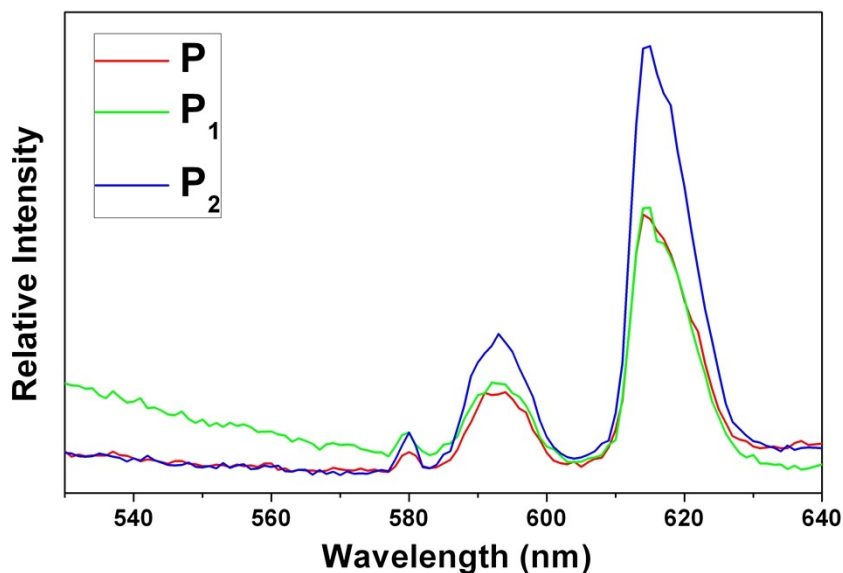

Fig. S8 emission spectra of  $P_1$ ,  $P_2$  and  $P$  under 326 nm excitation.

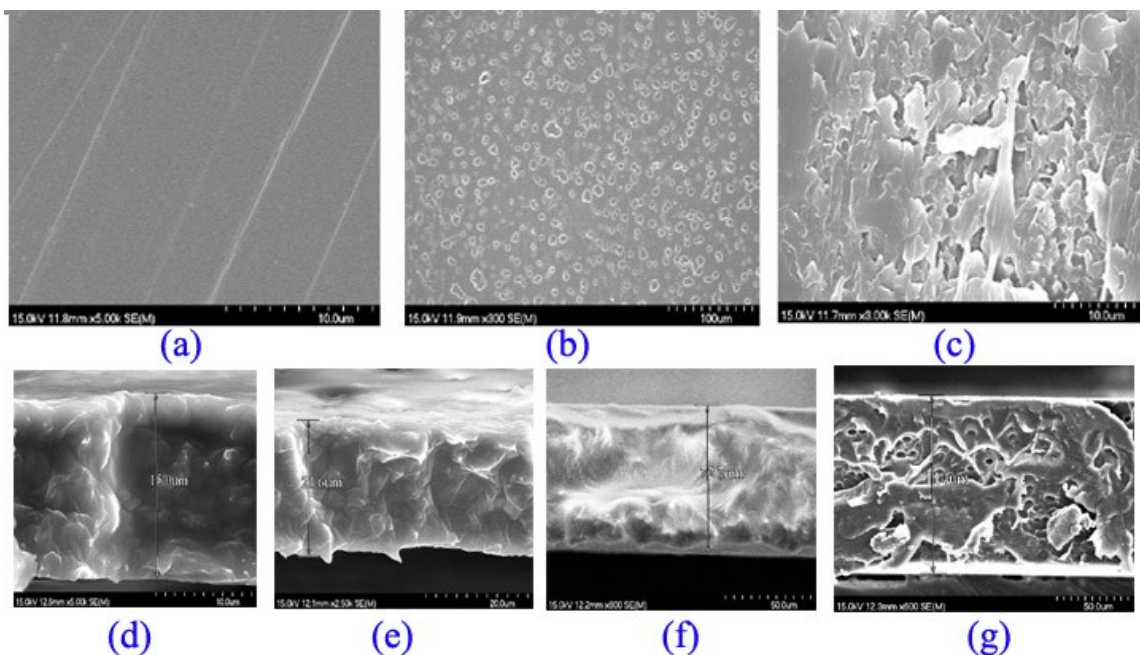

**Fig. S9** SEM images of films **P** with (a) smooth surface, (b) porous surface and (c) surface defects; SEM images of cross-section of films **P** with (d) 15 $\mu\text{m}$ , (e) 21.6 $\mu\text{m}$ , (f) 72.7 $\mu\text{m}$ , (g) 114 $\mu\text{m}$ .

*EDS Analysis of A and B*

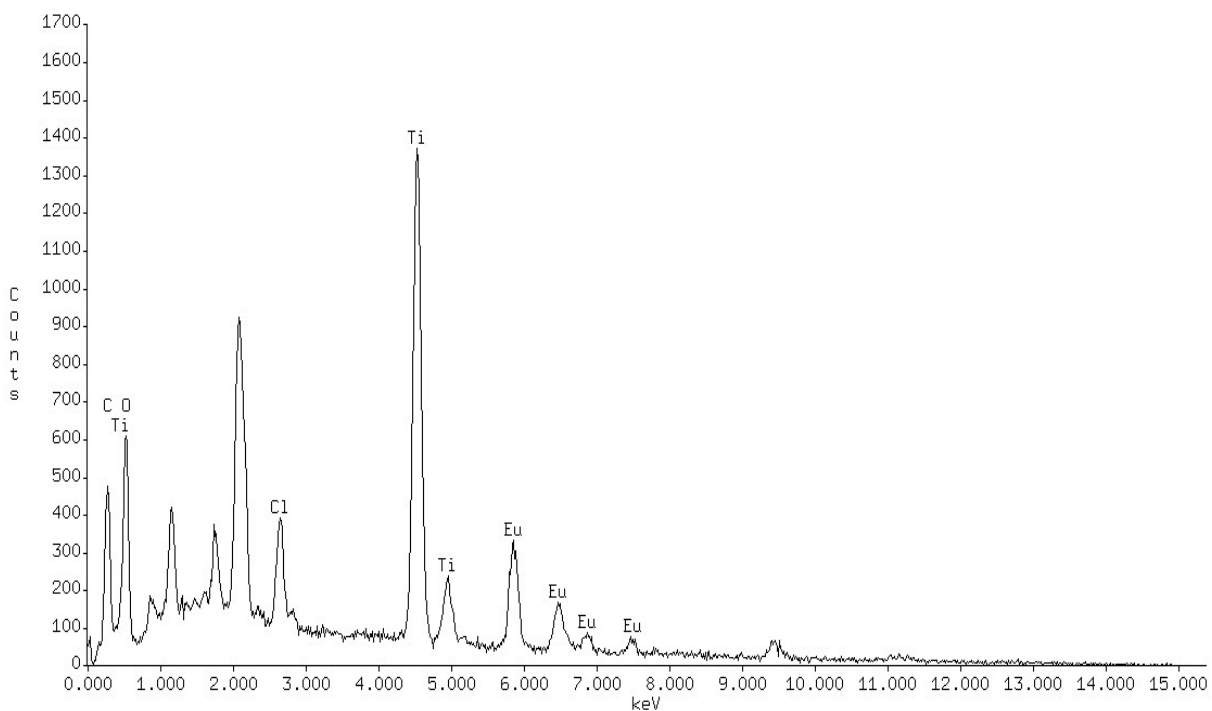

**Fig. S10** EDS on sample **A**

**Table S3** EDS on sample A

| Element | Atomic Percentage | Weight Percentage |
|---------|-------------------|-------------------|
| C       | 33.28 %           | 15.05 %           |
| O       | 44.82 %           | 27.00 %           |
| Cl      | 2.13 %            | 2.85 %            |
| Ti      | 14.81 %           | 26.71 %           |
| Eu      | 4.96 %            | 28.39 %           |

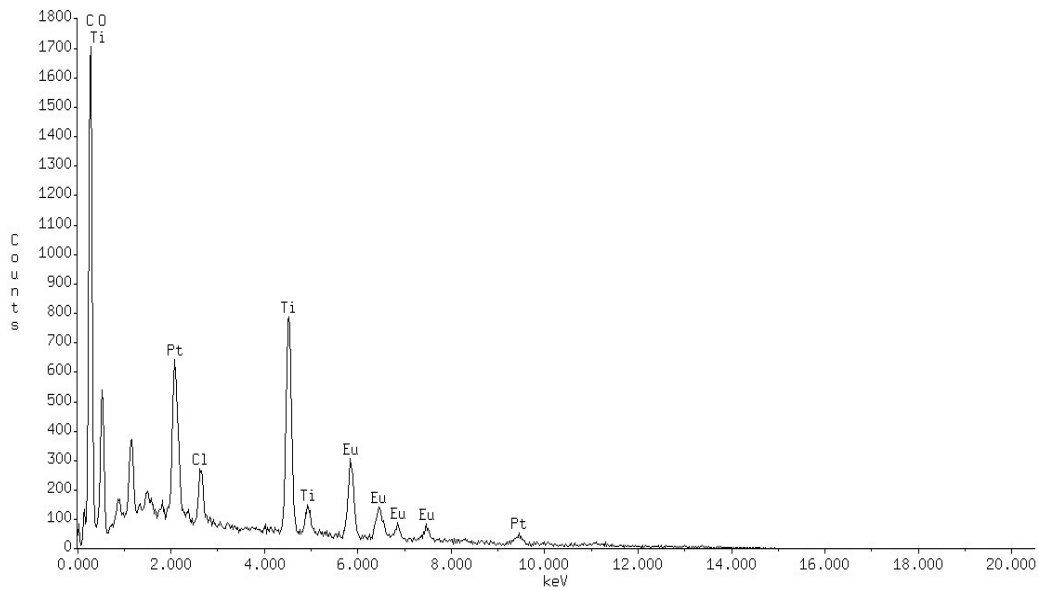

**Fig. S11** EDS on sample B

**Table S3** EDS on sample B

| Element | Atomic Percentage | Weight Percentage |
|---------|-------------------|-------------------|
| C       | 31.51 %           | 11.63 %           |
| O       | 40.24 %           | 19.78 %           |
| Cl      | 1.18 %            | 1.28 %            |
| Ti      | 12.91 %           | 19.01 %           |
| Eu      | 7.60 %            | 35.52 %           |



*XPS Analysis of A and B*

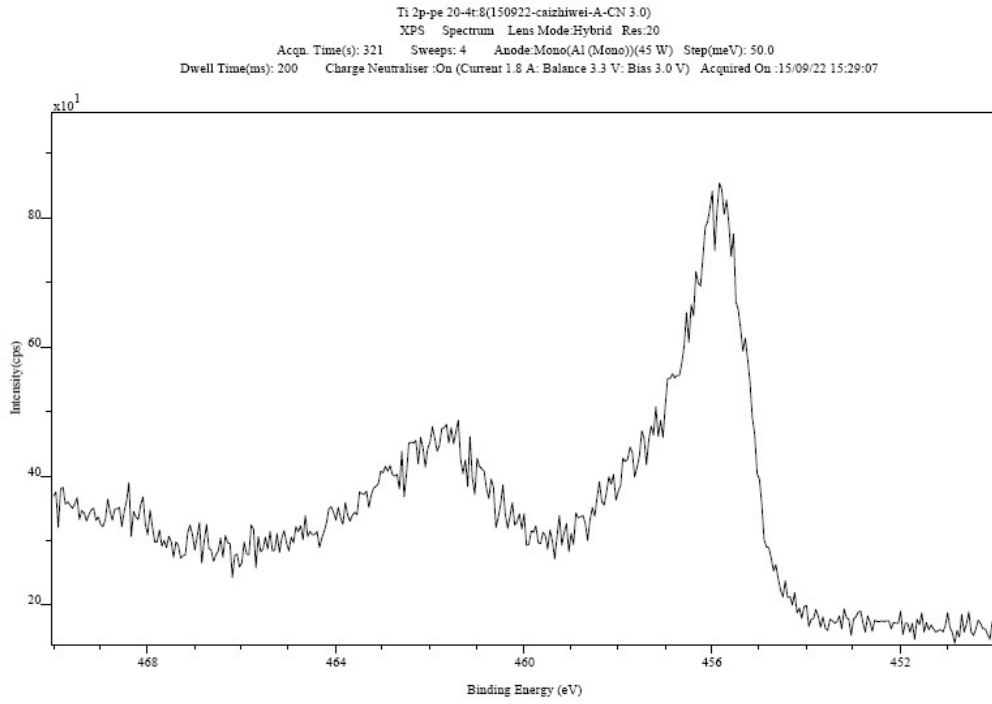

**Fig. S12** XPS signal of A for Ti 2p region.

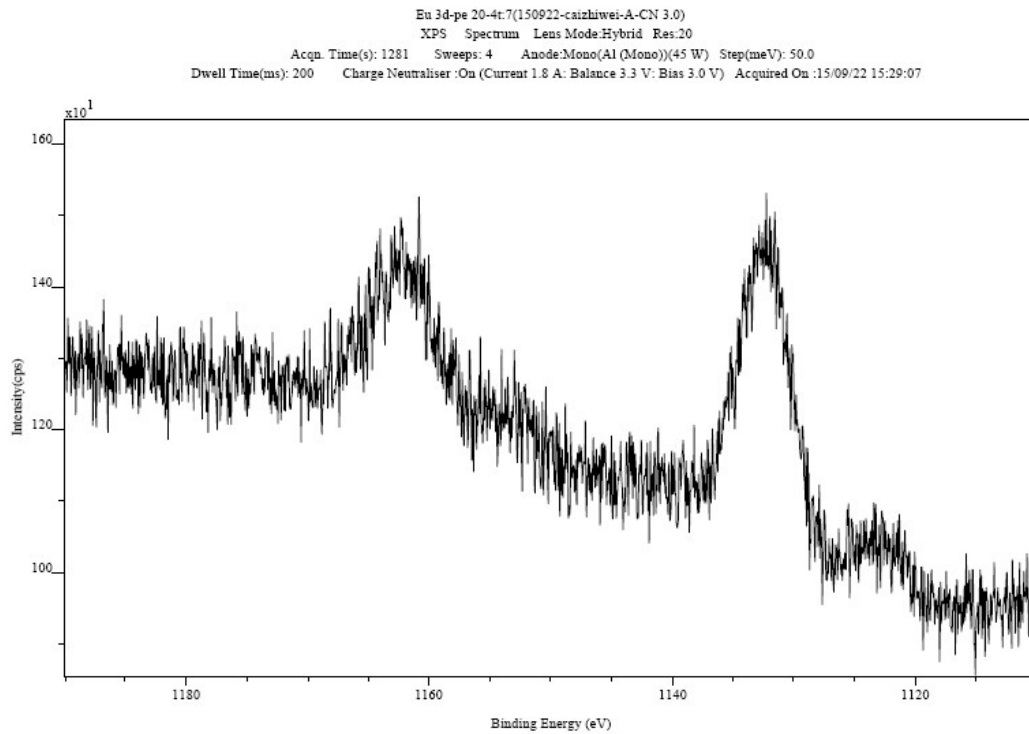

**Fig. S13** XPS signal of A for Eu 3d region

Ti 2p-pe 20-4:8(150722-caizhiwei-Eu-Ti)  
XPS Spectrum Lens Mode:Hybrid Res:20  
Acq. Time(s): 321 Sweeps: 4 Anode:Mono(Al (Mono))(45 W) Step(meV): 50.0  
Dwell Time(ms): 200 Charge Neutraliser :On (Current 1.8 A: Balance 3.3 V: Bias 1.0 V) Acquired On :15/07/22 09:46:26

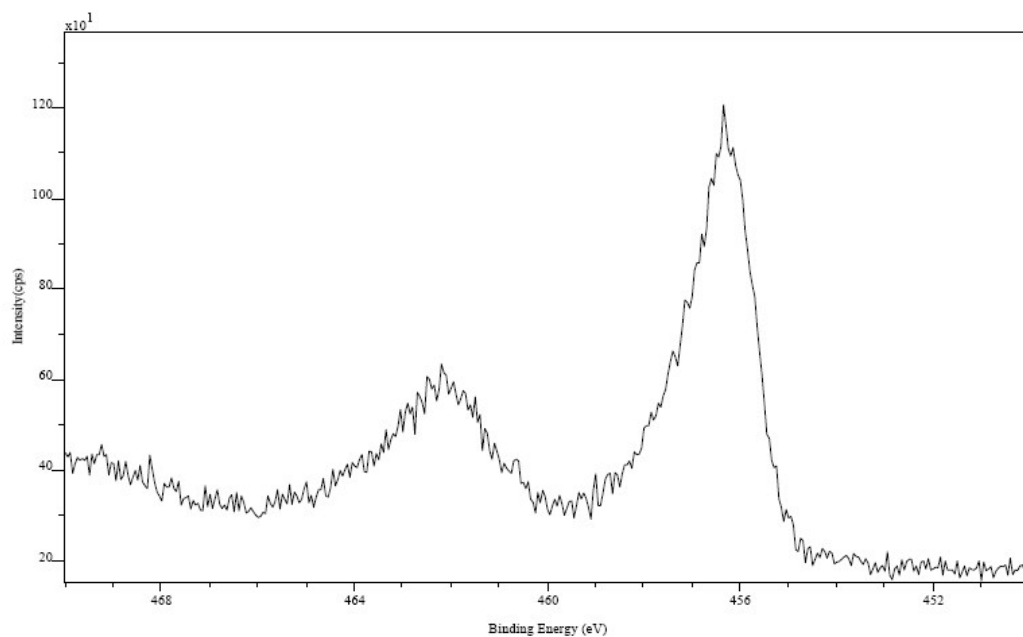

Fig. S14 XPS signal of **B** for Ti 2p region.

Eu 3d-pe 20:7(150722-caizhiwei-Eu-Ti)  
XPS Spectrum Lens Mode:Hybrid Res:20  
Acq. Time(s): 320 Sweeps: 1 Anode:Mono(Al (Mono))(45 W) Step(meV): 50.0  
Dwell Time(ms): 200 Charge Neutraliser :On (Current 1.8 A: Balance 3.3 V: Bias 1.0 V) Acquired On :15/07/22 09:46:26

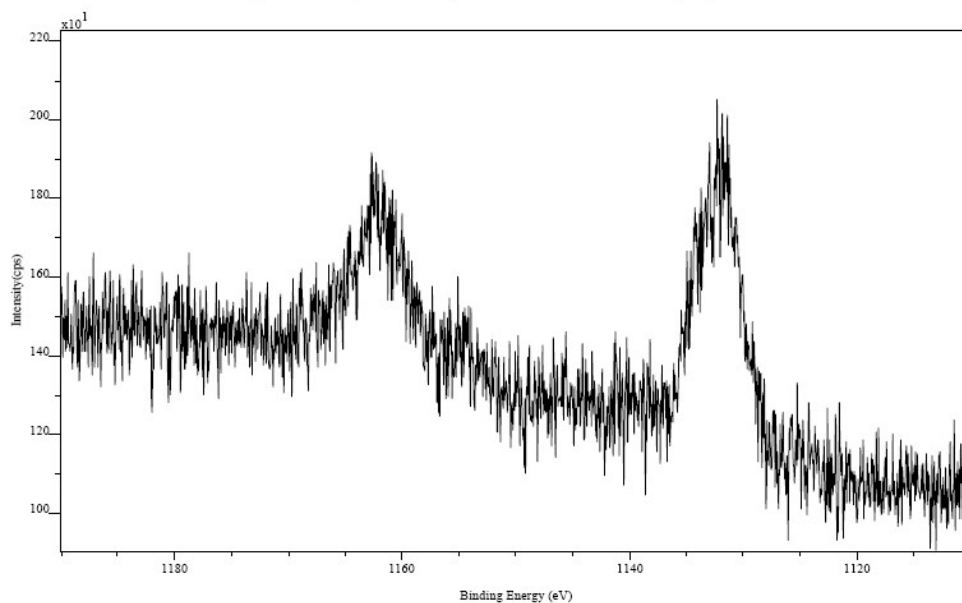

Fig. S15 XPS signal of **B** for Eu 3d region

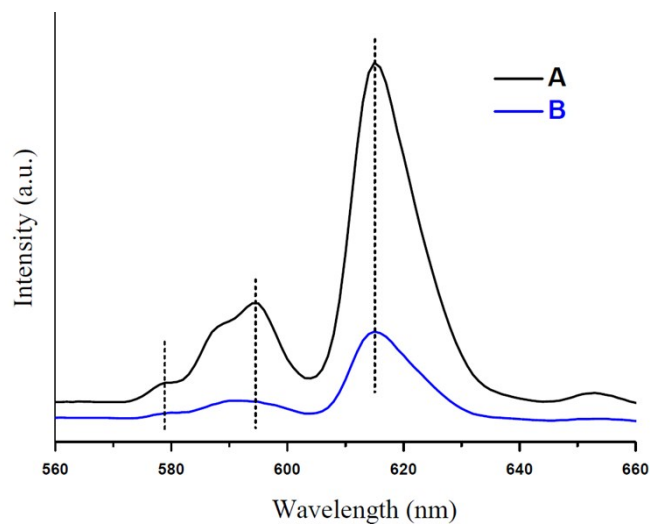

**Fig. S16** fluorescence spectrum of A and B under 365 nm excitation

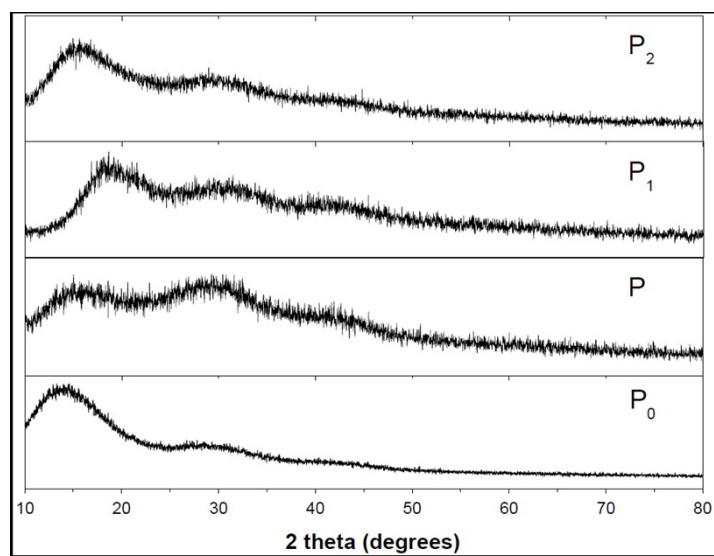

**Fig. S17** Powder-XRD of P<sub>0</sub>, P, P<sub>1</sub> and P<sub>2</sub>.

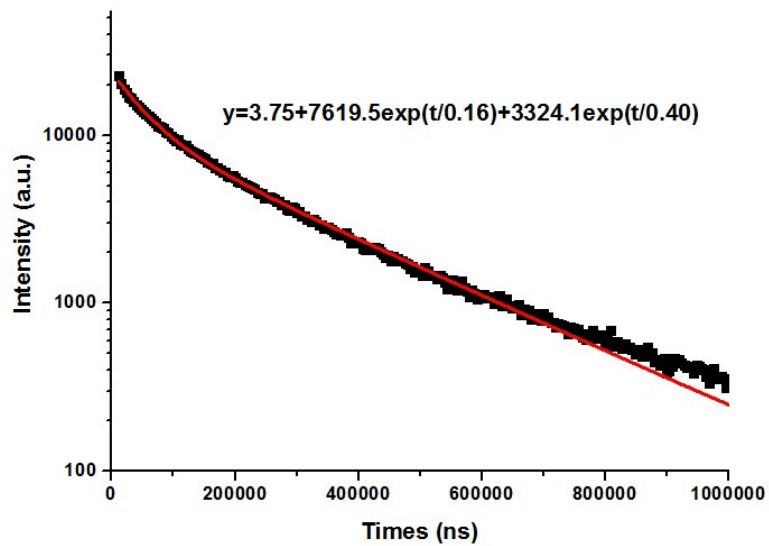

Figure S18. The decay and fitting curves of PL lifetime spectrum.
